# Supplementary material for: NAD kinase promotes Staphylococcus aureus pathogenesis by supporting production of virulence factors and protective enzymes
Source: eLife journal article supplement (doi:10.7554/elife.79941), 2022-06-01

# Figure supplement 1A

Original

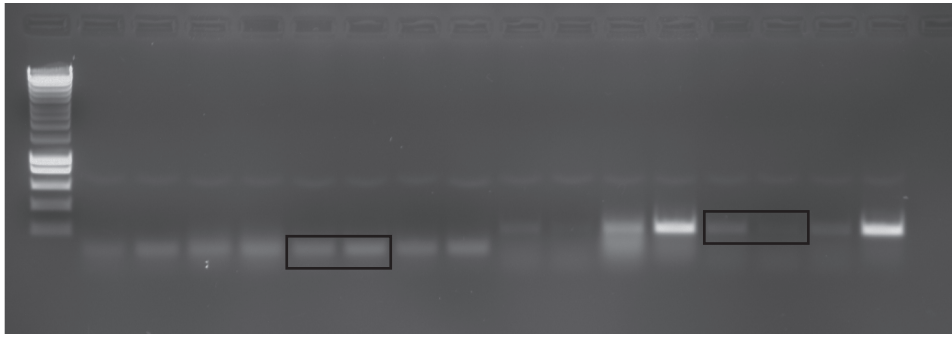

Cropped

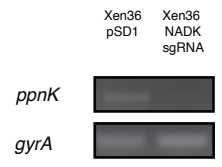

Supplement: fig1-figsupp1-data1 [file elife-79941-fig1-figsupp1-data1-v1.pdf]
