# Supplementary material for: NAD kinase promotes Staphylococcus aureus pathogenesis by supporting production of virulence factors and protective enzymes
Source: eLife journal article supplement (doi:10.7554/elife.79941), 2022-06-01

**Figure 5C**  
Original

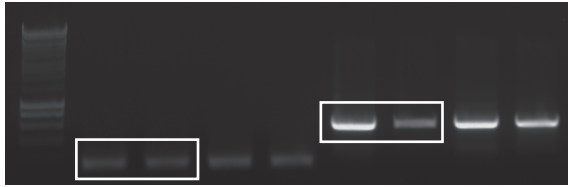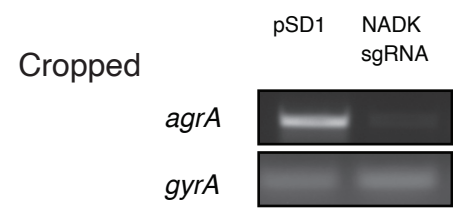

Supplement: fig5-data3 [file elife-79941-fig5-data3-v1.pdf]
